# Supplementary material for: The RING-Finger Protein NbRFP1 Contributes to Regulating the Host Hypersensitive Response Induced by Oat Dwarf Virus RepA
Source: MDPI journal article supplement (doi:10.3390/ijms24097697), 2023-04-22
Supplement: s1 [file s1]

**Table S1: List of primers used in this study**

| <b>Primer</b>                              | <b>sequences ( 5'- 3')</b>       |
|--------------------------------------------|----------------------------------|
| Primers used for BiFC                      |                                  |
| NbRFP1-p2YN- F                             | CCCTTAATTAACATGGGTGGAAAGAGTTCAAG |
| NbRFP1-p2YN- R                             | GGGACTAGTGTAGAGCTTTATTCGGGTTAG   |
| NbRFP1:M1-p2YN-F                           | CCCTTAATTAACATGATGGGTGGAAAG      |
| NbRFP1:M1-p2YN-R                           | GGGACTAGTGGCCATGATCTC            |
| NbRFP1:M2-p2YN-F                           | CCCTTAATTAACATGCCATCTGCTCCC      |
| NbRFP1:M2-p2YN-R                           | GGGACTAGTGTAGAGCTTTATTCG         |
| Primers used for various expression vector |                                  |
| RepA-Flag-pBA-F                            | GGTACCATGGCTACCGTTGCTTCC         |
| RepA-Flag-pBA-R                            | GGATCCGAGATCTTGCCCAGGAAGTC       |
| NbRFP1-pCHF3-F                             | GGTACCATGGGTGGAAAGAGTTCAAG       |
| NbRFP1-pCHF3-R                             | GGATCCTCAGTAGAGCTTTATTCGGG       |
| NbRFP1-pCHF3-NeGFP-R                       | GGATCCGTAGAGCTTTATTCGGGTTAG      |
| Primers used for VIGS                      |                                  |
| NbRFP1-TRV-RNA2-F                          | GAATTCCATCGGGCAGAATTTGAACC       |
| NbRFP1-TRV-RNA2-R                          | GGATCCGTATAATCGACAAGGGAAACTT     |
| Primers used for qRT-PCR                   |                                  |
| NbGADPH-F                                  | GCAGTGAACGACCCATTTATCTC          |
| NbGADPH-R                                  | AACCTTCTTGGCACCACCCT             |
| NbRFP1-F                                   | CATCGGGCAGAATTTGAACC             |
| NbRFP1-R                                   | GTATAATCGACAAGGGAAACTT           |

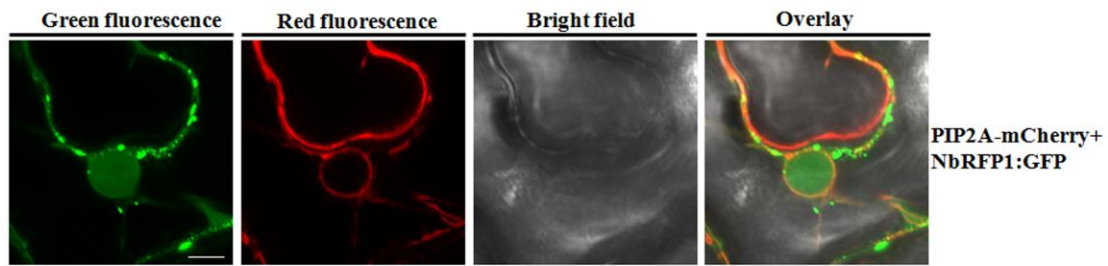

**Figures S1:** The sublocalization of the NbRFP1 in *N. benthamiana* leaf epidermis was assayed using PIP2A-mCherry as a marker for the plasma membrane. The GFP and RFP fluorescence was observed via confocal microscopy at 48 hpi. Bar scale = 10  $\mu$ m.

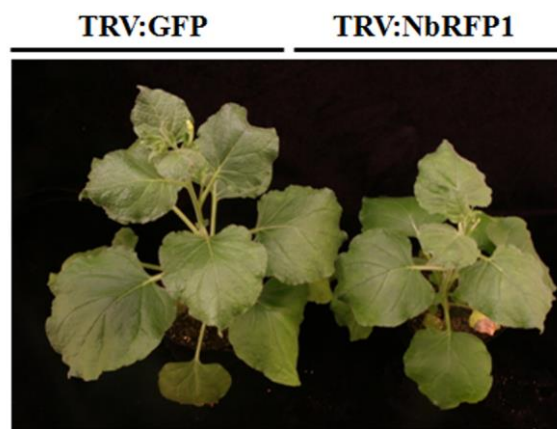

**Figures S2:** Photograph from *N. benthamiana* plants showing NbRFP1-silenced symptoms was taken at 28 days after co-agroinfiltration using TRV1 and TRV2:NbRFP1.
